# Supplementary material for: Maternal, neonatal, pregnancy outcome characteristics of pregnant women with high plasma cell-free DNA concentration in non-invasive prenatal screening: a retrospective analysis
Source: Front Pediatr. 2023 Aug 17;11:1195818. doi: 10.3389/fped.2023.1195818 (PMC10469925; doi:10.3389/fped.2023.1195818)
Supplement: Supplementary file 1 [file Table1.xls]

## Sheet: Sheet1
STABLE | Details of the maternal and new-born characteristics of the high concentration cfDNA cases (N = 118)
Maternal medical history	N	Maternal age (years) Mean ± SD	Gestational age (weeks) M (p25,p75)	BMI1 Mean ± SD	cf-DNA Mean ± SD	SAB (N)	IVF (N)	mono parous (N)	LMWH (N)	Hormones (N)	PTD (N)	Induction of labor (N)	Newborn height Mean ± SD	Newborn weight Mean ± SD	BMI2 (N)
Total population	118	30.37±4.88	18(16,21)	22.61±3.53	1.3±1.18	49	15	106	31	17	31	21	47.83±3.43	2.59±0.6	11.66±1.31
NMH	34(28.81)	30.44±5.98	18(17,23)	22.90±3.07	1.51±1.92	7	2	31	1	0	3	10	49.15±3.51	2.84±0.52	11.79±1.43
APS	15(12.71)	33.33±4.58	16(15,16)	22.13±3.81	1.06±0.28	14	4	13	15	5	4	0	48.57±2.15	2.74±0.51	11.55±1.74
SLE	4(3.39)	29.5±1.29	19(17,24)	21.05±4.20	0.93±0.17	2	0	4	1	3	1	0	50	2.43±1.02	12.6
SS	1(0.85)	37	15	22.3214	1.01	1	1	1	0	0	0	0	50	2.95	11.8
GHT	8(6.78)	26.25±2.60	22(17,23)	20.92±3.17	1.10±0.55	2	1	8	0	1	1	2	50	2.14±1.29	12.2
LP	5(4.24)	30.4±6.07	20(16,20)	21.29±2.45	0.98±0.26	1	0	5	0	3	0	0	49±5.57	3.06±0.43	12.86±1.27
PIH (PE)	10(8.47)	31.5±4.17	20(19,24)	26.43±3.82	1.05±0.33	3	0	10	0	0	6	3	46.67±4.16	2.23±0.79	11.28±1.35
ICP	6(5.08)	27.67±4.89	17(16,18)	20.51±1.58	1.23±0.50	3	0	4	0	0	6	0	48	2.53	10.9809
GDM	2(1.69)	28±1.41	18,20	22.21±1.98	1.19±0.61	1	0	2	0	0	1	0	45	2.3	11.358
Tumor	5(4.24)	30±2.91	17(15,18)	21.18±2.02	1.34±0.82	0	1	4	0	0	0	2	41	1.9	11.3028
RA	1(0.85)	27	19	18.03	0.76	0	0	1	0	0	0	1
APS/GHT	2(1.69)	30±1.41	15,16	20.54±2.44	0.93±0.05	1	1	2	2	0	0	0
APS/PIH	1(0.85)	31	14	18.8271	0.8	1	0	1	1	0	0	0
APS/ICP	3(2.54)	29.67±2.31	16,17	24.01±6.75	1.10±0.14	1	1	2	3	0	2	0	44.5±0.71	2.25±0.14	11.38±1.08
APS/GDM	2(1.69)	28.5±2.12	15,16	21.57±5.41	1.95±0.5	2	0	2	2	0	0	0
SLE/SS	1(0.85)	27	17	20.03	0.74	0	0	1	0	0	0	0	48	2.4	10.4167
SLE/GHT	1(0.85)	31	17	26.22	0.62	1	0	1	1	0	0	0
SLE/PIH	2(1.69)	32.5±6.36	17,19	24.19±1.48	1.52±0.75	1	0	2	0	2	1	1		1.58
SLE/GDM	1(0.85)	29	17	27.6398	0.77	0	0	1	1	0	0	0	45	2.3	11.358
LP/PIH	1(0.85)	27	13	25.39	1.84	1	0	1	0	1	1	0
PIH/ICP	1(0.85)	32	16	22.0386	0.89	0	1	0	0	0	1	0
PIH/GDM	2(1.69)	36±5.65	17,21	23.18±0.06	1.13±0.49	0	2	1	1	0	1	0
PIH/Tumor	2(1.69)	32±1.41	17	22.48±4.12	1.51±0.56	2	1	1	0	0	1	1	42	2.01	11.3946
ICP/GDM	2(1.69)	36±4.24264	26,30	27.31±4.35	1.54±0.76	1	0	2	0	0	2	0	43	2.1	11.3575
APS/PIH/ICP	1(0.85)	30	19	19.1467	2.28	1	0	1	1	1	0	0	46	2.5	11.8147
SS/GHT/LP	1(0.85)	31	29	23.3091	1.32	0	0	1	0	1	0	1
NS?	1(0.85)	22	26	22.7862	0.66	0	0	1	0	0	0	0	48	2.1
UCTD	1(0.85)	28	16	17.301	2.54	1	0	1	1	0	0	0	50	3.3
Perinatal cardiomyopathy	1(0.85)	26	14	28.2828	0.95	1	0	1	1	0	0	0
Congenital fibrinemia	1(0.85)	25	20	19.6283	5.7	1	0	1	0	0	0	0
Note: Data are expressed as mean ± SD and N (%). Some cases failed to obtain valid birth information due to the forgotten information of mothers in other hospitals Abbreviations: NMH, no medical history, APS, antiphospholipid syndrome, SLE, systemic lupus erythematosus, SS, Sjogren's syndrome, GHT, gestational hypothyroidism, LP, thrombocytopenia, ICP, intrahepatic cholestasis, GDM, gestational d…
